# Supplementary material for: 2,2′-(Hydrazine-1,2-diylidenedimethylylidene)bis(6-isopropyl-3-methylphenol) based selective dual-channel chemosensor for Cu2+ in semi-aqueous media
Source: Royal Society of Chemistry journal article supplement (doi:10.1039/c4ra04656k), 2014-01-01
Supplement: c4ra04656k1.pdf [file c4ra04656k1.pdf]

**2, 2'-(hydrazine-1, 2-diylidenedimethylylidene) bis (6-isopropyl-3-methylphenol) Based Selective Dual Channel Chemosensor for Cu<sup>2+</sup> in Semi-Aqueous Medium**

Umesh Fegade<sup>ac</sup>, Anu Saini<sup>d</sup>, Suban K. Sahoo<sup>b</sup>, Narinder Singh<sup>c\*</sup>, Ratnamala Bendre<sup>a\*</sup>, Anil Kuwar<sup>a\*</sup>

<sup>a</sup>School of Chemical Sciences, North Maharashtra University, Jalgaon, 425001 (MS) India.

<sup>b</sup>Department of Applied Chemistry, SV National Institute of technology, Surat (Gujrat), India

<sup>c</sup>Department of Chemistry, Indian Institute of Tecnology, Ropar, Rupanagar, Punjab, India

<sup>d</sup>Centre for Nanoscience and Nanotechnology (UIEAST), Panjab University, Chandigarh, India

---

\* Corresponding authors. Tel.: +91-257-2257432; fax: +91-257-2257403.

E-mail: [kuwaras@gmail.com](mailto:kuwaras@gmail.com), [bendreras@rediffmail.com](mailto:bendreras@rediffmail.com), [nsingh@iitrpr.ac.in](mailto:nsingh@iitrpr.ac.in)

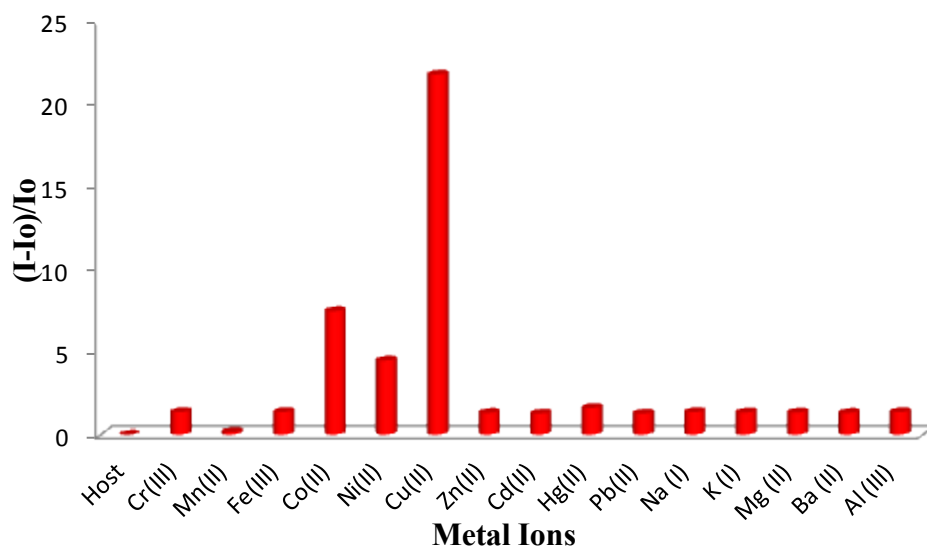

**Figure S1.** Fluorescence ratiometric response ( $I-I_0/I_0$ ) of compound **1** ( $c = 5 \times 10^{-6}$  M) upon the addition of a particular metal nitrates ( $c = 5 \times 10^{-5}$  M) in methanol containing 40 % water.

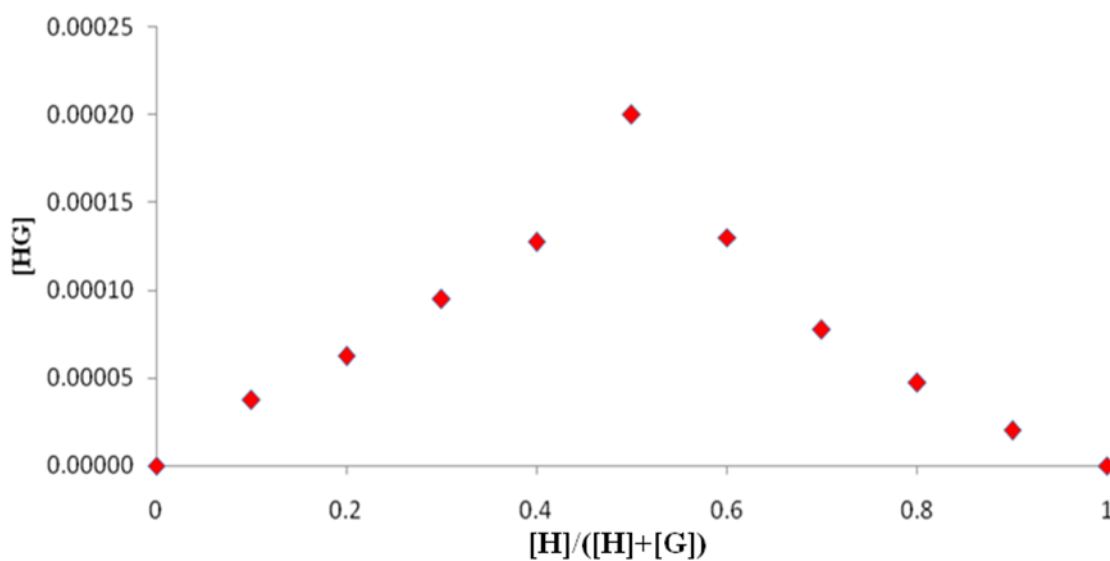

**Figure S2** 1:1 Stoichiometry of the host guest relationship was realized from the Job's plot.

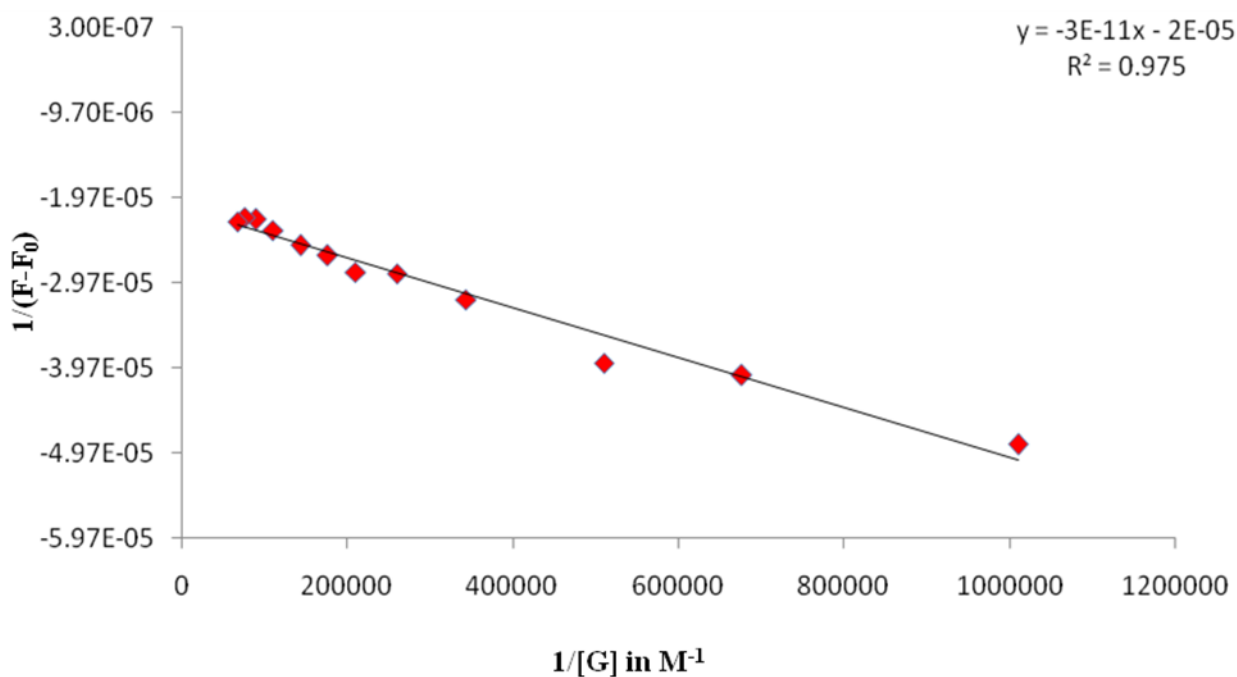

**Figure S3** Benesi-Hildebrand Plot (adjusted equation:  $1/F-F_0 = -3E-11x-2E-05 \ 1/[G]$ ,  $R=0.975$ ) and the K value is  $666667 \ M^{-1}$ .

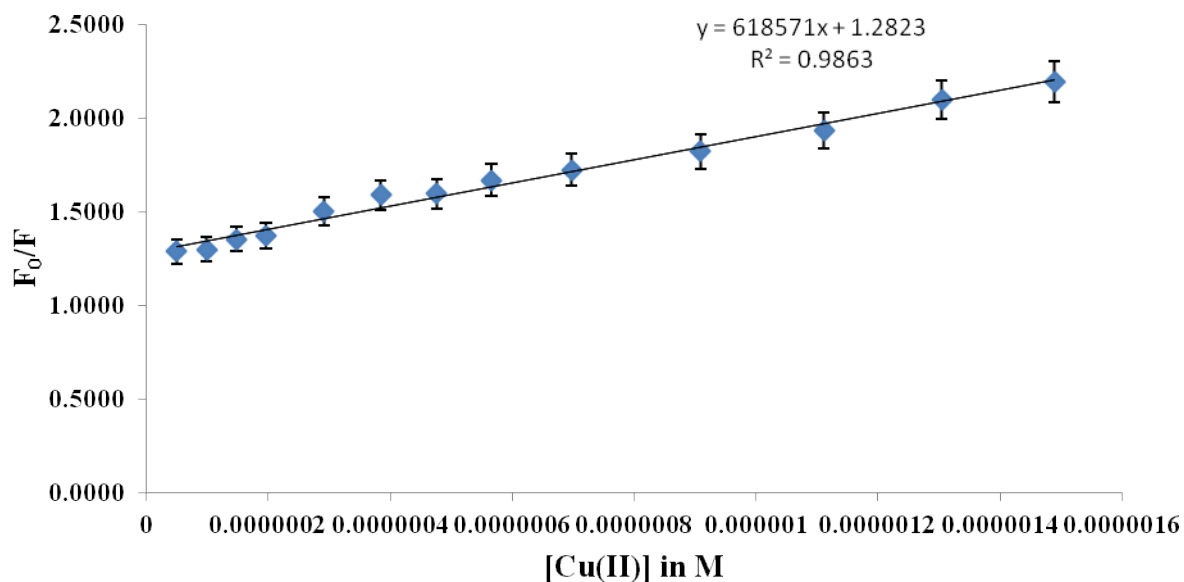

**Figure S4** Stern-Volmer plots for titrations of receptor **1** with different concentrations of  $Cu^{2+}$  metal salt.

**Table S2.** A comparison of literature reported sensors with present work

| Group                      | Technique           | Solvent System                              | Detection Limit         | Ref. |
|----------------------------|---------------------|---------------------------------------------|-------------------------|------|
| Wang<br><i>et al.</i>      | Fluorescence        | Acetonitrile-water                          | N.E                     | 1    |
| Reddy<br><i>et al.</i>     | Fluorescence        | Acetonitrile                                | $3 \times 10^{-8}$ M    | 2    |
| Yu<br><i>et al.</i>        | Fluorescence        | Acetonitrile                                | $2 \times 10^{-7}$ M    | 3    |
| Shellaiah<br><i>et al.</i> | Fluorescence        | Acetonitrile                                | $9.72 \times 10^{-7}$ M | 4    |
| Li Shang<br><i>et al.</i>  | Fluorescence        | Water                                       | 8 nM                    | 5    |
| <b>Present<br/>Work</b>    | <b>Fluorescence</b> | <b>MeOH/H<sub>2</sub>O<br/>(60:40, v/v)</b> | <b>50 nM</b>            | -    |

*N.E. represent not evaluated*

### Reference

1. H.F. Wang, S.P. Wu, 2010, doi:10.1016/j.snb.2013.01.054.
2. N. Reddy, C. S. Janakipriya, P. S. Korrapati, S. Thennarasu, A. B. Mandal, *Analyst*, 2013, 138, 1130.
3. Y. Yu, N. Bogliotti, S. Maisonneuve, J. Tang, J. Xie, *Tetrahedron Letter*, 2013, 54, 1877.
4. M. Shellaiah, Y.H. Wu, A. Singh, M. V. R. Raju and H.C. Lin, *J. Mater. Chem. A*, 2013, 1, 1310.
5. L. Shang and S. Dong, *J. Mater. Chem.*, 2008, 18, 4636.
